# Supplementary material for: Public Concern About Monitoring Twitter Users and Their Conversations to Recruit for Clinical Trials: Survey Study
Source: PubMed Central journal article supplement (PMC6914244; doi:10.2196/15455), 2019-10-30
Supplement: jmir_v21i10e15455_app2.pdf [file jmir_v21i10e15455_app2.pdf]

**Multimedia Appendix 2: Respondents' demographics.**

| <b>CHARACTERISTIC</b>                                                    |                                        | <b>N (%)</b> |
|--------------------------------------------------------------------------|----------------------------------------|--------------|
| <b>Life affected by a chronic or rare disease</b>                        |                                        |              |
|                                                                          | Yes                                    | 151 (25.2%)  |
|                                                                          | No                                     | 413 (68.8%)  |
|                                                                          | I don't want to share this information | 36 (6.0%)    |
| <b>Age</b>                                                               |                                        |              |
|                                                                          | 18-29                                  | 152 (25.2%)  |
|                                                                          | 30-39                                  | 136 (22.6%)  |
|                                                                          | 40-49                                  | 119 (19.7%)  |
|                                                                          | 50-59                                  | 89 (14.8%)   |
|                                                                          | 60-69                                  | 61 (10.1%)   |
|                                                                          | 70-99                                  | 46 (7.6%)    |
| <b>Gender</b>                                                            |                                        |              |
|                                                                          | Male                                   | 324 (53.7%)  |
|                                                                          | Female                                 | 261 (43.3%)  |
|                                                                          | Other                                  | 7 (1.2%)     |
|                                                                          | I don't want to share this info        | 11 (1.8%)    |
| <b>Ethnicity/racial background</b><br>(multiple options were selectable) |                                        |              |
|                                                                          | African American / Black               | 66 (10.1%)   |
|                                                                          | American Indian / Alaska Native        | 24 (3.7%)    |
|                                                                          | Asian / Pacific Islander               | 42 (6.4%)    |
|                                                                          | Hispanic                               | 63 (9.7%)    |
|                                                                          | Middle Eastern                         | 10 (1.5%)    |

|                               |                                        |             |
|-------------------------------|----------------------------------------|-------------|
|                               | White                                  | 421 (64.5%) |
|                               | Other                                  | 23 (3.5%)   |
|                               | I don't want to share this information | 4 (0.6%)    |
| <b>Degree/level of school</b> |                                        |             |
|                               | No schooling completed                 | 1 (0.2%)    |
|                               | Nursery school to 8th grade            | 5 (0.8%)    |
|                               | Some high school, no diploma           | 17 (2.8%)   |
|                               | High school graduate or equivalent     | 118 (19.6%) |
|                               | Some college credit, no degree         | 128 (21.2%) |
|                               | Trade/technical/vocational training    | 42 (7.0%)   |
|                               | Associate degree                       | 64 (10.6%)  |
|                               | Bachelor's degree                      | 153 (25.4%) |
|                               | Master's degree                        | 56 (9.3%)   |
|                               | Professional degree                    | 8 (1.3%)    |
|                               | Doctorate degree                       | 11 (1.8%)   |
