# Supplementary material for: Public Concern About Monitoring Twitter Users and Their Conversations to Recruit for Clinical Trials: Survey Study
Source: PubMed Central journal article supplement (PMC6914244; doi:10.2196/15455), 2019-10-30
Supplement: jmir_v21i10e15455_app3.pdf [file jmir_v21i10e15455_app3.pdf]

### Multimedia Appendix 3: Respondents' Twitter usage.

| TWITTER USAGE                          |                                 | N (%)       |
|----------------------------------------|---------------------------------|-------------|
| <b>Previous use</b>                    |                                 |             |
|                                        | No, never used                  | 174 (28.9%) |
|                                        | Visited website, no account     | 82 (13.6%)  |
|                                        | Have a registered account       | 301 (49.9%) |
|                                        | Previously, but deleted account | 46 (7.6%)   |
| <b>Frequency of use</b>                |                                 |             |
|                                        | Almost never                    | 48 (16.0%)  |
|                                        | About one per month             | 53 (17.7%)  |
|                                        | About once a week               | 77 (25.7%)  |
|                                        | Nearly every day                | 122 (40.7%) |
|                                        | No response                     | 1           |
| <b>Last Twitter message sent</b>       |                                 |             |
|                                        | I have never sent a Tweet       | 30 (10.0%)  |
|                                        | Today                           | 81 (27.0%)  |
|                                        | Last week                       | 100 (33.3%) |
|                                        | Last month                      | 30 (10.0%)  |
|                                        | More than a month ago           | 59 (19.7%)  |
|                                        | No response                     | 1           |
| <b>Twitter account privacy setting</b> |                                 |             |
|                                        | Private                         | 66 (21.9%)  |
|                                        | Public                          | 186 (61.8%) |
|                                        | Don't know                      | 49 (16.3%)  |
