# Supplementary material for: Public Concern About Monitoring Twitter Users and Their Conversations to Recruit for Clinical Trials: Survey Study
Source: PubMed Central journal article supplement (PMC6914244; doi:10.2196/15455), 2019-10-30
Supplement: jmir_v21i10e15455_app4.pdf [file jmir_v21i10e15455_app4.pdf]

**Multimedia Appendix 4: Respondents' Twitter literacy.**

| <b>TWITTER LITERACY</b>                                                                                                                                                                                                                               |                                 | <b>N (%)</b> |
|-------------------------------------------------------------------------------------------------------------------------------------------------------------------------------------------------------------------------------------------------------|---------------------------------|--------------|
| <b>Including a hashtag (the '#' symbol) in front of a keyword, such as #BladderCancer or #Pregnancy, is used as a way to link Twitter messages to a specific topic and make it easy for others who are interested in the same topic to find them.</b> |                                 |              |
|                                                                                                                                                                                                                                                       | Yes, this is correct (CORRECT)  | 429 (71.1%)  |
|                                                                                                                                                                                                                                                       | No, this is incorrect           | 36 (6.0%)    |
|                                                                                                                                                                                                                                                       | Don't know                      | 138 (22.9%)  |
| <b>You can protect your Twitter messages by changing your account settings to private. Then your messages won't be accessible to everyone.</b>                                                                                                        |                                 |              |
|                                                                                                                                                                                                                                                       | Yes, this is correct (CORRECT)  | 355 (58.9%)  |
|                                                                                                                                                                                                                                                       | No, this is incorrect           | 47 (7.8%)    |
|                                                                                                                                                                                                                                                       | Don't know                      | 201 (33.3%)  |
| <b>Old Twitter messages are automatically deleted from Twitter's servers after 1 year.</b>                                                                                                                                                            |                                 |              |
|                                                                                                                                                                                                                                                       | Yes, this is correct            | 59 (9.8%)    |
|                                                                                                                                                                                                                                                       | No, this is incorrect (CORRECT) | 159 (26.4%)  |
|                                                                                                                                                                                                                                                       | Don't know                      | 385 (63.9%)  |
| <b>Unregistered visitors to Twitter can still view publicly created Twitter messages but cannot use the "search" feature of the website to view older tweets.</b>                                                                                     |                                 |              |
|                                                                                                                                                                                                                                                       | Yes, this is correct            | 177 (29.4%)  |
|                                                                                                                                                                                                                                                       | No, this is incorrect (CORRECT) | 80 (13.3%)   |
|                                                                                                                                                                                                                                                       | Don't know                      | 346 (57.4%)  |
| <b>Twitter offers a search interface that allows software programmers to search for Twitter messages by keyword and to collect profile information about the originating Twitter account.</b>                                                         |                                 |              |
|                                                                                                                                                                                                                                                       | Yes, this is correct (CORRECT)  | 186 (30.9%)  |
|                                                                                                                                                                                                                                                       | No, this is incorrect           | 48 (8.0%)    |
|                                                                                                                                                                                                                                                       | Don't know                      | 369 (61.2%)  |
