# Supplementary material for: Public Concern About Monitoring Twitter Users and Their Conversations to Recruit for Clinical Trials: Survey Study
Source: PubMed Central journal article supplement (PMC6914244; doi:10.2196/15455), 2019-10-30
Supplement: jmir_v21i10e15455_app5.pdf [file jmir_v21i10e15455_app5.pdf]

**Multimedia Appendix 5: Respondents' general Internet privacy concerns.**

| <b>GENERAL INTERNET PRIVACY CONCERNS</b>                                                                                                            |                      | <b>N (%)</b> |
|-----------------------------------------------------------------------------------------------------------------------------------------------------|----------------------|--------------|
| <b>Concern about privacy while using the Internet</b>                                                                                               |                      |              |
|                                                                                                                                                     | Very concerned       | 156 (25.9%)  |
|                                                                                                                                                     | Somewhat concerned   | 253 (42.0%)  |
|                                                                                                                                                     | Not too concerned    | 131 (21.7%)  |
|                                                                                                                                                     | Not concerned at all | 47 (8.0%)    |
|                                                                                                                                                     | Don't know           | 16 (2.7%)    |
| <b>Concern about people obtaining personal information about Twitter users from their social media account(s) and activities</b>                    |                      |              |
|                                                                                                                                                     | Very concerned       | 213 (35.3%)  |
|                                                                                                                                                     | Somewhat concerned   | 212 (35.2%)  |
|                                                                                                                                                     | Not too concerned    | 119 (19.7%)  |
|                                                                                                                                                     | Not concerned at all | 49 (8.1%)    |
|                                                                                                                                                     | Don't know           | 10 (1.7%)    |
| <b>Concern about posts users make on social media being viewed or shared with people not within their immediate network of friends or followers</b> |                      |              |
|                                                                                                                                                     | Very concerned       | 141 (23.4%)  |
|                                                                                                                                                     | Somewhat concerned   | 172 (28.5%)  |
|                                                                                                                                                     | Not too concerned    | 170 (28.2%)  |
|                                                                                                                                                     | Not concerned at all | 111 (18.4%)  |
|                                                                                                                                                     | Don't know           | 9 (1.5%)     |
| <b>Concern about posts users make on social media being used by companies for promotional purposes</b>                                              |                      |              |
|                                                                                                                                                     | Very concerned       | 148 (24.5%)  |
|                                                                                                                                                     | Somewhat concerned   | 162 (26.9%)  |
|                                                                                                                                                     | Not too concerned    | 187 (31.0%)  |
|                                                                                                                                                     | Not concerned at all | 93 (15.4%)   |
|                                                                                                                                                     | Don't know           | 13 (2.1%)    |

| <b>Concern about social media companies sharing or selling Twitter users' information with third parties</b> |                      |             |
|--------------------------------------------------------------------------------------------------------------|----------------------|-------------|
|                                                                                                              | Very concerned       | 215 (35.7%) |
|                                                                                                              | Somewhat concerned   | 205 (34.0%) |
|                                                                                                              | Not too concerned    | 110 (18.2%) |
|                                                                                                              | Not concerned at all | 64 (10.6%)  |
|                                                                                                              | Don't know           | 9 (1.5%)    |
