# Supplementary material for: Public Concern About Monitoring Twitter Users and Their Conversations to Recruit for Clinical Trials: Survey Study
Source: PubMed Central journal article supplement (PMC6914244; doi:10.2196/15455), 2019-10-30
Supplement: jmir_v21i10e15455_app6.pdf [file jmir_v21i10e15455_app6.pdf]

**Multimedia Appendix 6: Respondents' Internet research privacy concerns.**

| <b>GENERAL INTERNET RESEARCH PRIVACY CONCERNS</b>                                                                                                                                                                                                                                                          |                      | <b>N (%)</b> |
|------------------------------------------------------------------------------------------------------------------------------------------------------------------------------------------------------------------------------------------------------------------------------------------------------------|----------------------|--------------|
| <b>Concern about researchers sending un-targeted tweets visible to all their followers with a link for more information on how to participate in a clinical trial</b>                                                                                                                                      |                      |              |
|                                                                                                                                                                                                                                                                                                            | Very concerned       | 106 (17.6%)  |
|                                                                                                                                                                                                                                                                                                            | Somewhat concerned   | 146 (24.2%)  |
|                                                                                                                                                                                                                                                                                                            | Not too concerned    | 178 (29.5%)  |
|                                                                                                                                                                                                                                                                                                            | Not concerned at all | 141 (23.4%)  |
|                                                                                                                                                                                                                                                                                                            | Don't know           | 32 (5.3%)    |
| <b>Concern about researchers noticing trending topics or hashtags related to health conditions (such as #Diabetes, #LungCancer, or #HeartDisease), and sending un-targeted Twitter messages that include a link to more information on how to participate in a clinical trial, using the same hashtag.</b> |                      |              |
|                                                                                                                                                                                                                                                                                                            | Very concerned       | 86 (14.3%)   |
|                                                                                                                                                                                                                                                                                                            | Somewhat concerned   | 140 (23.2%)  |
|                                                                                                                                                                                                                                                                                                            | Not too concerned    | 184 (30.5%)  |
|                                                                                                                                                                                                                                                                                                            | Not concerned at all | 165 (27.4%)  |
|                                                                                                                                                                                                                                                                                                            | Don't know           | 28 (4.6%)    |
| <b>Concern about researchers actively monitoring Twitter activity to identify and contact potential participants for clinical trials</b>                                                                                                                                                                   |                      |              |
|                                                                                                                                                                                                                                                                                                            | Very concerned       | 122 (20.2%)  |
|                                                                                                                                                                                                                                                                                                            | Somewhat concerned   | 171 (28.4%)  |
|                                                                                                                                                                                                                                                                                                            | Not too concerned    | 164 (27.2%)  |
|                                                                                                                                                                                                                                                                                                            | Not concerned at all | 110 (18.2%)  |
|                                                                                                                                                                                                                                                                                                            | Don't know           | 36 (6.0%)    |
| <b>Concern about researchers using paid advertised Twitter messages ("sponsored tweets") to try to increase the likelihood that a clinical trial recruitment message gets seen by as many individuals as possible</b>                                                                                      |                      |              |
|                                                                                                                                                                                                                                                                                                            | Very concerned       | 93 (15.4%)   |
|                                                                                                                                                                                                                                                                                                            | Somewhat concerned   | 150 (24.9%)  |
|                                                                                                                                                                                                                                                                                                            | Not too concerned    | 179 (29.7%)  |

|                                                                                                                                                                                     |                      |             |
|-------------------------------------------------------------------------------------------------------------------------------------------------------------------------------------|----------------------|-------------|
|                                                                                                                                                                                     | Not concerned at all | 151 (25.0%) |
|                                                                                                                                                                                     | Don't know           | 30 (5.0%)   |
| <b>Concern about Twitter keeping track of whether you click on a Twitter recruitment message related to a health study (for example "Seeking participants for a #Cancer study")</b> |                      |             |
|                                                                                                                                                                                     | Very concerned       | 88 (14.6%)  |
|                                                                                                                                                                                     | Somewhat concerned   | 171 (28.4%) |
|                                                                                                                                                                                     | Not too concerned    | 200 (33.2%) |
|                                                                                                                                                                                     | Not concerned at all | 108 (17.9%) |
|                                                                                                                                                                                     | Don't know           | 35 (5.8%)   |
| <b>Concern about monitoring of hashtags in tweets (keywords used to organize and link conversations on Twitter, such as #SleepApnea, #Depression, or #HeartDisease)</b>             |                      |             |
|                                                                                                                                                                                     | Very concerned       | 83 (13.8%)  |
|                                                                                                                                                                                     | Somewhat concerned   | 161 (26.7%) |
|                                                                                                                                                                                     | Not too concerned    | 199 (33.0%) |
|                                                                                                                                                                                     | Not concerned at all | 134 (22.2%) |
|                                                                                                                                                                                     | Don't know           | 26 (4.3%)   |
| <b>Concern about reviewing the text of users' public Twitter messages</b>                                                                                                           |                      |             |
|                                                                                                                                                                                     | Very concerned       | 108 (17.9%) |
|                                                                                                                                                                                     | Somewhat concerned   | 157 (26.0%) |
|                                                                                                                                                                                     | Not too concerned    | 186 (30.9%) |
|                                                                                                                                                                                     | Not concerned at all | 122 (20.2%) |
|                                                                                                                                                                                     | Don't know           | 30 (5.0%)   |
| <b>Concern about reviewing the text of users' profile description</b>                                                                                                               |                      |             |
|                                                                                                                                                                                     | Very concerned       | 132 (21.9%) |
|                                                                                                                                                                                     | Somewhat concerned   | 153 (25.4%) |
|                                                                                                                                                                                     | Not too concerned    | 186 (30.9%) |
|                                                                                                                                                                                     | Not concerned at all | 108 (17.9%) |
|                                                                                                                                                                                     | Don't know           | 24 (4.0%)   |
