# Supplementary material for: Public Concern About Monitoring Twitter Users and Their Conversations to Recruit for Clinical Trials: Survey Study
Source: PubMed Central journal article supplement (PMC6914244; doi:10.2196/15455), 2019-10-30
Supplement: jmir_v21i10e15455_app9.pdf [file jmir_v21i10e15455_app9.pdf]

**Multimedia Appendix 9: Stratified analysis of respondents who indicated “Very concerned” or “Somewhat concerned” about their privacy while using the Internet.**

| <b>GENERAL INTERNET RESEARCH PRIVACY CONCERNS</b>                                                                                                                                                                                                                                                          | <b>All (603)</b> | <b>High General Privacy Concern (409)</b> | <b>Low General Privacy Concern (178)</b> | <b>Active Twitter User (199)</b> |
|------------------------------------------------------------------------------------------------------------------------------------------------------------------------------------------------------------------------------------------------------------------------------------------------------------|------------------|-------------------------------------------|------------------------------------------|----------------------------------|
| <b>Concern about researchers sending un-targeted tweets visible to all their followers with a link for more information on how to participate in a clinical trial</b>                                                                                                                                      | 252 (41.8%)      | 204 (49.9%)                               | 43 (24.2%)                               | 74 (37.2%)                       |
| <b>Concern about researchers noticing trending topics or hashtags related to health conditions (such as #Diabetes, #LungCancer, or #HeartDisease), and sending un-targeted Twitter messages that include a link to more information on how to participate in a clinical trial, using the same hashtag.</b> | 226 (37.5%)      | 186 (45.5%)                               | 32 (18.0%)                               | 61 (30.7%)                       |
| <b>Concern about researchers actively monitoring Twitter activity to identify and contact potential participants for clinical trials</b>                                                                                                                                                                   | 293 (48.6%)      | 235 (57.5%)                               | 55 (30.9%)                               | 81 (40.7%)                       |
| <b>Concern about researchers using paid advertised Twitter messages (“sponsored tweets”) to try to increase the likelihood that a clinical trial recruitment message gets seen by as many individuals as possible</b>                                                                                      | 243 (40.3%)      | 201 (49.1%)                               | 38 (21.3%)                               | 69 (34.7%)                       |
| <b>Concern about Twitter keeping track of whether you click on a Twitter recruitment message related to a health study (for example “Seeking participants for a #Cancer study”)</b>                                                                                                                        | 259 (43.0%)      | 214 (52.5%)                               | 44 (24.7%)                               | 66 (33.2%)                       |
| <b>Concern about monitoring of hashtags in tweets (keywords used to organize and link conversations on Twitter, such as #SleepApnea, #Depression, or #HeartDisease)</b>                                                                                                                                    | 244 (40.0%)      | 206 (50.4%)                               | 32 (18.0%)                               | 66 (33.2%)                       |
| <b>Concern about reviewing the text of users’ public Twitter messages</b>                                                                                                                                                                                                                                  | 265 (43.9%)      | 218 (53.5%)                               | 42 (23.6%)                               | 73 (36.7%)                       |
| <b>Concern about reviewing the text of users’ profile description</b>                                                                                                                                                                                                                                      | 285 (47.3%)      | 225 (55.0%)                               | 53 (29.8%)                               | 79 (39.7%)                       |
