# Supplementary material for: Public Concern About Monitoring Twitter Users and Their Conversations to Recruit for Clinical Trials: Survey Study
Source: PubMed Central journal article supplement (PMC6914244; doi:10.2196/15455), 2019-10-30
Supplement: jmir_v21i10e15455_app10.pdf [file jmir_v21i10e15455_app10.pdf]

**Multimedia Appendix 10: Respondents' concern about scenarios described in vignettes with a focus on study disease and entity that monitors social media user activity.**

| CONCERN EXPRESSED IN RESPONSE TO VIGNETTES                                                                                                                                                                                                                                                                                                                                                                                                                                                                                                   |                                                                                | N (%)       |
|----------------------------------------------------------------------------------------------------------------------------------------------------------------------------------------------------------------------------------------------------------------------------------------------------------------------------------------------------------------------------------------------------------------------------------------------------------------------------------------------------------------------------------------------|--------------------------------------------------------------------------------|-------------|
| <p><b>Cancer vignette:</b> A <i>cancer research team</i> at a <i>major research university</i> is looking for participants to take part in a clinical trial. They use a software tool that automatically search the past 2 years of Twitter activity to locate accounts that mentioned "<i>cancer</i>" anywhere within the text of a Twitter message. Once a relevant message is identified, the research team sends a public "@reply" to the original message, asking if the user is interested in participating in the clinical trial.</p> |                                                                                |             |
| <b>Concern about users' Twitter activity being monitored as described above for the purpose of recruitment into a clinical trial</b>                                                                                                                                                                                                                                                                                                                                                                                                         |                                                                                |             |
|                                                                                                                                                                                                                                                                                                                                                                                                                                                                                                                                              | Very concerned                                                                 | 110 (18.2%) |
|                                                                                                                                                                                                                                                                                                                                                                                                                                                                                                                                              | Somewhat concerned                                                             | 190 (31.5%) |
|                                                                                                                                                                                                                                                                                                                                                                                                                                                                                                                                              | Not too concerned                                                              | 181 (30.0%) |
|                                                                                                                                                                                                                                                                                                                                                                                                                                                                                                                                              | Not concerned at all                                                           | 102 (16.9%) |
|                                                                                                                                                                                                                                                                                                                                                                                                                                                                                                                                              | Don't know                                                                     | 20 (3.3%)   |
| <b>Factors that most impacted level of concern about the above scenario</b><br>(respondents could select up to 2)                                                                                                                                                                                                                                                                                                                                                                                                                            |                                                                                |             |
|                                                                                                                                                                                                                                                                                                                                                                                                                                                                                                                                              | Nature of the disease/medical condition being monitored for                    | 163 (27.0%) |
|                                                                                                                                                                                                                                                                                                                                                                                                                                                                                                                                              | Whether the text of a Twitter message was monitored vs. a hashtag              | 152 (25.2%) |
|                                                                                                                                                                                                                                                                                                                                                                                                                                                                                                                                              | How far back in your Twitter history the researchers might look                | 167 (27.7%) |
|                                                                                                                                                                                                                                                                                                                                                                                                                                                                                                                                              | Who is doing the research                                                      | 284 (47.1%) |
|                                                                                                                                                                                                                                                                                                                                                                                                                                                                                                                                              | Whether a human being or a computer program is analyzing your Twitter messages | 148 (24.5%) |
|                                                                                                                                                                                                                                                                                                                                                                                                                                                                                                                                              | Use of Twitter as a method in which the                                        | 162 (26.9%) |

|                                                                                                                                                                                                                                                                                                                                                                                                                                                                                                                                                                                                      |                                                                   |             |
|------------------------------------------------------------------------------------------------------------------------------------------------------------------------------------------------------------------------------------------------------------------------------------------------------------------------------------------------------------------------------------------------------------------------------------------------------------------------------------------------------------------------------------------------------------------------------------------------------|-------------------------------------------------------------------|-------------|
|                                                                                                                                                                                                                                                                                                                                                                                                                                                                                                                                                                                                      | researchers contacted you                                         |             |
| <b>Comfort level if a researcher approached them in person at a relevant medical facility</b>                                                                                                                                                                                                                                                                                                                                                                                                                                                                                                        |                                                                   |             |
|                                                                                                                                                                                                                                                                                                                                                                                                                                                                                                                                                                                                      | More comfortable in-person                                        | 176 (29.2%) |
|                                                                                                                                                                                                                                                                                                                                                                                                                                                                                                                                                                                                      | Neither more or less comfort                                      | 209 (34.7%) |
|                                                                                                                                                                                                                                                                                                                                                                                                                                                                                                                                                                                                      | Less comfortable in-person                                        | 137 (22.8%) |
|                                                                                                                                                                                                                                                                                                                                                                                                                                                                                                                                                                                                      | Don't know                                                        | 81 (13.4%)  |
| <p><b>Obesity vignette:</b> <i>Scientists at a pharmaceutical company</i> are looking for participants to take part in a clinical trial to test a drug designed to treat <i>obesity</i>. They use a software tool that allows them to automatically search the past 6 months of Twitter activity to locate accounts that mentioned “obesity”, “overweight” or “lose weight” within the text of a Twitter message. Once a relevant message is identified, the scientists send a public “@reply” to the original message, asking if the user is interested in participating in the clinical trial.</p> |                                                                   |             |
| <b>Concern about users’ Twitter activity being monitored as described above for the purpose of recruitment into a clinical trial</b>                                                                                                                                                                                                                                                                                                                                                                                                                                                                 |                                                                   |             |
|                                                                                                                                                                                                                                                                                                                                                                                                                                                                                                                                                                                                      | Very concerned                                                    | 112 (18.6%) |
|                                                                                                                                                                                                                                                                                                                                                                                                                                                                                                                                                                                                      | Somewhat concerned                                                | 187 (31.0%) |
|                                                                                                                                                                                                                                                                                                                                                                                                                                                                                                                                                                                                      | Not too concerned                                                 | 181 (30.0%) |
|                                                                                                                                                                                                                                                                                                                                                                                                                                                                                                                                                                                                      | Not concerned at all                                              | 99 (16.4%)  |
|                                                                                                                                                                                                                                                                                                                                                                                                                                                                                                                                                                                                      | Don't know                                                        | 24 (4.0%)   |
| <b>Factors that most impacted level of concern about the above scenario</b><br>(respondents could select up to 2)                                                                                                                                                                                                                                                                                                                                                                                                                                                                                    |                                                                   |             |
|                                                                                                                                                                                                                                                                                                                                                                                                                                                                                                                                                                                                      | Nature of the disease/medical condition being monitored for       | 169 (28.0%) |
|                                                                                                                                                                                                                                                                                                                                                                                                                                                                                                                                                                                                      | Whether the text of a Twitter message was monitored vs. a hashtag | 149 (24.7%) |
|                                                                                                                                                                                                                                                                                                                                                                                                                                                                                                                                                                                                      | How far back in your Twitter history the researchers might look   | 147 (24.4%) |
|                                                                                                                                                                                                                                                                                                                                                                                                                                                                                                                                                                                                      | Who is doing the research                                         | 286 (47.4%) |

|                                                                                                                                                                                                                                                                                                                                                                                                                                                                                                                                                                                                      |                                                                                |             |
|------------------------------------------------------------------------------------------------------------------------------------------------------------------------------------------------------------------------------------------------------------------------------------------------------------------------------------------------------------------------------------------------------------------------------------------------------------------------------------------------------------------------------------------------------------------------------------------------------|--------------------------------------------------------------------------------|-------------|
|                                                                                                                                                                                                                                                                                                                                                                                                                                                                                                                                                                                                      | Whether a human being or a computer program is analyzing your Twitter messages | 123 (20.4%) |
|                                                                                                                                                                                                                                                                                                                                                                                                                                                                                                                                                                                                      | Use of Twitter as a method in which the researchers contacted you              | 187 (31.0%) |
| <b>Comfort level if a researcher approached them in person at a relevant medical facility</b>                                                                                                                                                                                                                                                                                                                                                                                                                                                                                                        |                                                                                |             |
|                                                                                                                                                                                                                                                                                                                                                                                                                                                                                                                                                                                                      | More comfortable in-person                                                     | 161 (26.7%) |
|                                                                                                                                                                                                                                                                                                                                                                                                                                                                                                                                                                                                      | Neither more or less comfort                                                   | 225 (37.3%) |
|                                                                                                                                                                                                                                                                                                                                                                                                                                                                                                                                                                                                      | Less comfortable in-person                                                     | 144 (23.9%) |
|                                                                                                                                                                                                                                                                                                                                                                                                                                                                                                                                                                                                      | Don't know                                                                     | 73 (12.1%)  |
| <p><b>HPV vignette:</b> A health officer at a state public health office is looking for participants to take part in a study to understand adoption of the HPV vaccination against cervical cancer. The health officer uses a software tool that allows them to search 2 years of Twitter activity to locate accounts that ever included the hashtag “#HPV” or “#HPVvaccine” or “cervical cancer prevention” in a Twitter message. Once identified, the health officer sends a public “@reply” to the original message, asking if the user is interested in participating in the clinical trial.</p> |                                                                                |             |
| <b>Concern about users’ Twitter activity being monitored as described above for the purpose of recruitment into a clinical trial</b>                                                                                                                                                                                                                                                                                                                                                                                                                                                                 |                                                                                |             |
|                                                                                                                                                                                                                                                                                                                                                                                                                                                                                                                                                                                                      | Very concerned                                                                 | 123 (20.4%) |
|                                                                                                                                                                                                                                                                                                                                                                                                                                                                                                                                                                                                      | Somewhat concerned                                                             | 175 (29.0%) |
|                                                                                                                                                                                                                                                                                                                                                                                                                                                                                                                                                                                                      | Not too concerned                                                              | 175 (29.0%) |
|                                                                                                                                                                                                                                                                                                                                                                                                                                                                                                                                                                                                      | Not concerned at all                                                           | 101 (16.8%) |
|                                                                                                                                                                                                                                                                                                                                                                                                                                                                                                                                                                                                      | Don't know                                                                     | 29 (4.8%)   |
| <b>Factors that most impacted level of concern about the above scenario</b><br>(respondents could select up to 2)                                                                                                                                                                                                                                                                                                                                                                                                                                                                                    |                                                                                |             |
|                                                                                                                                                                                                                                                                                                                                                                                                                                                                                                                                                                                                      | Nature of the disease/medical condition being monitored for                    | 202 (33.5%) |
|                                                                                                                                                                                                                                                                                                                                                                                                                                                                                                                                                                                                      | Whether the text of a Twitter message was monitored vs. a hashtag              | 162 (26.9%) |
|                                                                                                                                                                                                                                                                                                                                                                                                                                                                                                                                                                                                      | How far back in your Twitter history the                                       | 126 (20.9%) |

|                                                                                                                                                                                                                                                                                                                                                                                                                                                                                                                    |                                                                                |             |
|--------------------------------------------------------------------------------------------------------------------------------------------------------------------------------------------------------------------------------------------------------------------------------------------------------------------------------------------------------------------------------------------------------------------------------------------------------------------------------------------------------------------|--------------------------------------------------------------------------------|-------------|
|                                                                                                                                                                                                                                                                                                                                                                                                                                                                                                                    | researchers might look                                                         |             |
|                                                                                                                                                                                                                                                                                                                                                                                                                                                                                                                    | Who is doing the research                                                      | 271 (44.9%) |
|                                                                                                                                                                                                                                                                                                                                                                                                                                                                                                                    | Whether a human being or a computer program is analyzing your Twitter messages | 122 (20.2%) |
|                                                                                                                                                                                                                                                                                                                                                                                                                                                                                                                    | Use of Twitter as a method in which the researchers contacted you              | 173 (28.7%) |
| <b>Comfort level if a researcher approached them in person at a relevant medical facility</b>                                                                                                                                                                                                                                                                                                                                                                                                                      |                                                                                |             |
|                                                                                                                                                                                                                                                                                                                                                                                                                                                                                                                    | More comfortable in-person                                                     | 169 (28.0%) |
|                                                                                                                                                                                                                                                                                                                                                                                                                                                                                                                    | Neither more or less comfort                                                   | 233 (38.6%) |
|                                                                                                                                                                                                                                                                                                                                                                                                                                                                                                                    | Less comfortable in-person                                                     | 136 (22.6%) |
|                                                                                                                                                                                                                                                                                                                                                                                                                                                                                                                    | Don't know                                                                     | 65 (10.8%)  |
| <p><b>HIV/AIDS vignette:</b> A research team at a major research university is looking for participants to take part in a clinical trial investigating treatment options for <i>HIV/AIDS</i>. A team member manually searches Twitter activity to locate accounts that used the hashtags “#HIV”, “#AIDS”, or “#SexwithMen” within the last 3 months. Once identified, the researchers send a public “@reply” to the original message, asking if the user is interested in participating in the clinical trial.</p> |                                                                                |             |
| <b>Concern about users' Twitter activity being monitored as described above for the purpose of recruitment into a clinical trial</b>                                                                                                                                                                                                                                                                                                                                                                               |                                                                                |             |
|                                                                                                                                                                                                                                                                                                                                                                                                                                                                                                                    | Very concerned                                                                 | 174 (28.9%) |
|                                                                                                                                                                                                                                                                                                                                                                                                                                                                                                                    | Somewhat concerned                                                             | 175 (29.0%) |
|                                                                                                                                                                                                                                                                                                                                                                                                                                                                                                                    | Not too concerned                                                              | 132 (21.9%) |
|                                                                                                                                                                                                                                                                                                                                                                                                                                                                                                                    | Not concerned at all                                                           | 96 (15.9%)  |
|                                                                                                                                                                                                                                                                                                                                                                                                                                                                                                                    | Don't know                                                                     | 26 (4.3%)   |
| <b>Factors that most impacted level of concern about the above scenario</b><br>(respondents could select up to 2)                                                                                                                                                                                                                                                                                                                                                                                                  |                                                                                |             |
|                                                                                                                                                                                                                                                                                                                                                                                                                                                                                                                    | Nature of the disease/medical condition being monitored for                    | 243 (40.3%) |
|                                                                                                                                                                                                                                                                                                                                                                                                                                                                                                                    | Whether the text of a Twitter message was                                      | 154 (25.5%) |

|                                                                                                                                                                                                                                                                                                                                                                                                                                                                                                                                                                                                                                      |                                                                                |             |
|--------------------------------------------------------------------------------------------------------------------------------------------------------------------------------------------------------------------------------------------------------------------------------------------------------------------------------------------------------------------------------------------------------------------------------------------------------------------------------------------------------------------------------------------------------------------------------------------------------------------------------------|--------------------------------------------------------------------------------|-------------|
|                                                                                                                                                                                                                                                                                                                                                                                                                                                                                                                                                                                                                                      | monitored vs. a hashtag                                                        |             |
|                                                                                                                                                                                                                                                                                                                                                                                                                                                                                                                                                                                                                                      | How far back in your Twitter history the researchers might look                | 133 (22.1%) |
|                                                                                                                                                                                                                                                                                                                                                                                                                                                                                                                                                                                                                                      | Who is doing the research                                                      | 250 (41.5%) |
|                                                                                                                                                                                                                                                                                                                                                                                                                                                                                                                                                                                                                                      | Whether a human being or a computer program is analyzing your Twitter messages | 127 (21.1%) |
|                                                                                                                                                                                                                                                                                                                                                                                                                                                                                                                                                                                                                                      | Use of Twitter as a method in which the researchers contacted you              | 190 (31.5%) |
| <b>Comfort level if a researcher approached them in person at a relevant medical facility</b>                                                                                                                                                                                                                                                                                                                                                                                                                                                                                                                                        |                                                                                |             |
|                                                                                                                                                                                                                                                                                                                                                                                                                                                                                                                                                                                                                                      | More comfortable in-person                                                     | 174 (28.9%) |
|                                                                                                                                                                                                                                                                                                                                                                                                                                                                                                                                                                                                                                      | Neither more or less comfort                                                   | 213 (35.3%) |
|                                                                                                                                                                                                                                                                                                                                                                                                                                                                                                                                                                                                                                      | Less comfortable in-person                                                     | 156 (25.9%) |
|                                                                                                                                                                                                                                                                                                                                                                                                                                                                                                                                                                                                                                      | Don't know                                                                     | 60 (10.0%)  |
| <p><b>Smoking vignette:</b> A health officer at a local public health office is looking for participants to take part in a study to understand the smoking habits of local citizens. The health officer uses a software tool that allows them to search the past 2 years of Twitter activity to locate accounts that mentioned words such as “smoking”, “cigarette”, “e-cigarette” or “vaping” within the text of a Twitter message. Once a relevant Twitter message is identified, the health officer sends a public “@reply” to the original message, asking if the user is interested in participating in the clinical trial.</p> |                                                                                |             |
| <b>Concern about users’ Twitter activity being monitored as described above for the purpose of recruitment into a clinical trial</b>                                                                                                                                                                                                                                                                                                                                                                                                                                                                                                 |                                                                                |             |
|                                                                                                                                                                                                                                                                                                                                                                                                                                                                                                                                                                                                                                      | Very concerned                                                                 | 91 (15.1%)  |
|                                                                                                                                                                                                                                                                                                                                                                                                                                                                                                                                                                                                                                      | Somewhat concerned                                                             | 164 (27.2%) |
|                                                                                                                                                                                                                                                                                                                                                                                                                                                                                                                                                                                                                                      | Not too concerned                                                              | 190 (31.5%) |
|                                                                                                                                                                                                                                                                                                                                                                                                                                                                                                                                                                                                                                      | Not concerned at all                                                           | 142 (23.6%) |
|                                                                                                                                                                                                                                                                                                                                                                                                                                                                                                                                                                                                                                      | Don't know                                                                     | 16 (2.7%)   |
| <b>Factors that most impacted level of concern about the above scenario</b><br>(respondents could select up to 2)                                                                                                                                                                                                                                                                                                                                                                                                                                                                                                                    |                                                                                |             |

|                                                                                               |                                                                                |             |
|-----------------------------------------------------------------------------------------------|--------------------------------------------------------------------------------|-------------|
|                                                                                               | Nature of the disease/medical condition being monitored for                    | 163 (27.0%) |
|                                                                                               | Whether the text of a Twitter message was monitored vs. a hashtag              | 146 (24.2%) |
|                                                                                               | How far back in your Twitter history the researchers might look                | 143 (24.7%) |
|                                                                                               | Who is doing the research                                                      | 269 (44.6%) |
|                                                                                               | Whether a human being or a computer program is analyzing your Twitter messages | 123 (20.4%) |
|                                                                                               | Use of Twitter as a method in which the researchers contacted you              | 173 (28.7%) |
| <b>Comfort level if a researcher approached them in person at a relevant medical facility</b> |                                                                                |             |
|                                                                                               | More comfortable in-person                                                     | 161 (26.7%) |
|                                                                                               | Neither more or less comfort                                                   | 267 (44.3%) |
|                                                                                               | Less comfortable in-person                                                     | 122 (20.3%) |
|                                                                                               | Don't know                                                                     | 52 (8.4%)   |
