# Supplementary material for: Public Concern About Monitoring Twitter Users and Their Conversations to Recruit for Clinical Trials: Survey Study
Source: PubMed Central journal article supplement (PMC6914244; doi:10.2196/15455), 2019-10-30
Supplement: jmir_v21i10e15455_app11.pdf [file jmir_v21i10e15455_app11.pdf]

**Multimedia Appendix 11: Responses to vignette sub-questions, stratified based on level of overall Internet privacy concern with vignette scenario.**

| <b>CONCERN EXPRESSED IN RESPONSE TO VIGNETTES</b>                                                                                    |                                                                                | <b>All</b>  | <b>Some Concern</b> | <b>Little/No Concern</b> |
|--------------------------------------------------------------------------------------------------------------------------------------|--------------------------------------------------------------------------------|-------------|---------------------|--------------------------|
| <b>Cancer vignette</b>                                                                                                               |                                                                                |             |                     |                          |
| <b>Concern about users' Twitter activity being monitored as described above for the purpose of recruitment into a clinical trial</b> |                                                                                | 603 (100%)  | 300 (49.8%)         | 283 (46.9%)              |
| <b>Factors that most impacted level of concern about the above scenario</b> (respondents could select up to 2)                       |                                                                                |             |                     |                          |
|                                                                                                                                      | Nature of the disease/medical condition being monitored for                    | 163 (27.0%) | 85 (28.3%)          | 76 (26.9%)               |
|                                                                                                                                      | Whether the text of a Twitter message was monitored vs. a hashtag              | 152 (25.2%) | 92 (30.7%)          | 54 (19.1%)               |
|                                                                                                                                      | How far back in your Twitter history the researchers might look                | 167 (27.7%) | 89 (29.7%)          | 74 (26.1%)               |
|                                                                                                                                      | Who is doing the research                                                      | 284 (47.1%) | 136 (45.3%)         | 140 (49.5%)              |
|                                                                                                                                      | Whether a human being or a computer program is analyzing your Twitter messages | 148 (24.5%) | 78 (26.0%)          | 67 (23.7%)               |
|                                                                                                                                      | Use of Twitter as a method in which the researchers contacted you              | 162 (26.9%) | 85 (28.3%)          | 69 (24.4%)               |
| <b>Comfort level if a researcher approached them in person at a relevant medical facility</b>                                        |                                                                                |             |                     |                          |
|                                                                                                                                      | More comfortable in-person                                                     | 176 (29.2%) | 114 (38.0%)         | 60 (21.2%)               |
|                                                                                                                                      | Neither more or less comfort                                                   | 209 (34.7%) | 85 (28.3%)          | 115 (40.6%)              |
|                                                                                                                                      | Less comfortable in-person                                                     | 137 (22.8%) | 61 (20.3%)          | 75 (26.5%)               |
|                                                                                                                                      | Don't know                                                                     | 81 (13.4%)  | 40 (13.3%)          | 33 (11.7%)               |
| <b>Obesity vignette</b>                                                                                                              |                                                                                |             |                     |                          |

| <b>CONCERN EXPRESSED IN RESPONSE TO VIGNETTES</b>                                                                                    |                                                                                | <b>All</b>  | <b>Some Concern</b> | <b>Little/No Concern</b> |
|--------------------------------------------------------------------------------------------------------------------------------------|--------------------------------------------------------------------------------|-------------|---------------------|--------------------------|
| <b>Concern about users' Twitter activity being monitored as described above for the purpose of recruitment into a clinical trial</b> |                                                                                | 603 (100%)  | 299 (49.6%)         | 280 (46.4%)              |
| <b>Factors that most impacted level of concern about the above scenario</b> (respondents could select up to 2)                       |                                                                                |             |                     |                          |
|                                                                                                                                      | Nature of the disease/medical condition being monitored for                    | 169 (28.0%) | 88 (29.4%)          | 77 (27.5%)               |
|                                                                                                                                      | Whether the text of a Twitter message was monitored vs. a hashtag              | 149 (24.7%) | 89 (29.8%)          | 55 (19.6%)               |
|                                                                                                                                      | How far back in your Twitter history the researchers might look                | 147 (24.4%) | 78 (26.1%)          | 61 (21.8%)               |
|                                                                                                                                      | Who is doing the research                                                      | 286 (47.4%) | 131 (43.8%)         | 148 (52.9%)              |
|                                                                                                                                      | Whether a human being or a computer program is analyzing your Twitter messages | 123 (20.4%) | 66 (22.1%)          | 52 (18.6%)               |
|                                                                                                                                      | Use of Twitter as a method in which the researchers contacted you              | 187 (31.0%) | 108 (36.1%)         | 72 (25.7%)               |
| <b>Comfort level if a researcher approached them in person at a relevant medical facility</b>                                        |                                                                                |             |                     |                          |
|                                                                                                                                      | More comfortable in-person                                                     | 161 (26.7%) | 92 (30.8%)          | 65 (23.2%)               |
|                                                                                                                                      | Neither more or less comfort                                                   | 225 (37.3%) | 98 (32.8%)          | 124 (44.3%)              |
|                                                                                                                                      | Less comfortable in-person                                                     | 144 (23.9%) | 75 (25.1%)          | 63 (22.5%)               |
|                                                                                                                                      | Don't know                                                                     | 73 (12.1%)  | 34 (11.4%)          | 28 (10.0%)               |
| <b>CONCERN EXPRESSED IN RESPONSE TO VIGNETTES</b>                                                                                    |                                                                                | <b>All</b>  | <b>Some Concern</b> | <b>Little/No Concern</b> |
| <b>HPV vignette</b>                                                                                                                  |                                                                                |             |                     |                          |
| <b>Concern about users' Twitter activity being monitored as described above for the purpose of recruitment into a clinical trial</b> |                                                                                | 603 (100%)  | 298 (49.4%)         | 276 (45.8%)              |

|                                                                                                                                      |                                                                                |             |                     |                          |
|--------------------------------------------------------------------------------------------------------------------------------------|--------------------------------------------------------------------------------|-------------|---------------------|--------------------------|
| <b>Factors that most impacted level of concern about the above scenario</b> (respondents could select up to 2)                       |                                                                                |             |                     |                          |
|                                                                                                                                      | Nature of the disease/medical condition being monitored for                    | 202 (33.5%) | 110 (36.9%)         | 86 (31.2%)               |
|                                                                                                                                      | Whether the text of a Twitter message was monitored vs. a hashtag              | 162 (26.9%) | 95 (31.9%)          | 62 (22.5%)               |
|                                                                                                                                      | How far back in your Twitter history the researchers might look                | 126 (20.9%) | 62 (20.8%)          | 59 (21.4%)               |
|                                                                                                                                      | Who is doing the research                                                      | 271 (44.9%) | 132 (44.3%)         | 130 (47.1%)              |
|                                                                                                                                      | Whether a human being or a computer program is analyzing your Twitter messages | 122 (20.2%) | 63 (21.1%)          | 54 (19.6%)               |
|                                                                                                                                      | Use of Twitter as a method in which the researchers contacted you              | 173 (28.7%) | 102 (34.2%)         | 63 (22.8%)               |
| <b>Comfort level if a researcher approached them in person at a relevant medical facility</b>                                        |                                                                                |             |                     |                          |
|                                                                                                                                      | More comfortable in-person                                                     | 169 (28.0%) | 103 (34.6%)         | 62 (22.5%)               |
|                                                                                                                                      | Neither more or less comfort                                                   | 233 (38.6%) | 87 (29.2%)          | 141 (51.1%)              |
|                                                                                                                                      | Less comfortable in-person                                                     | 136 (22.6%) | 78 (26.2%)          | 50 (18.1%)               |
|                                                                                                                                      | Don't know                                                                     | 65 (10.8%)  | 30 (10.1%)          | 23 (8.3%)                |
| <b>HIV/AIDS vignette</b>                                                                                                             |                                                                                |             |                     |                          |
| <b>CONCERN EXPRESSED IN RESPONSE TO VIGNETTES</b>                                                                                    |                                                                                | <b>All</b>  | <b>Some Concern</b> | <b>Little/No Concern</b> |
| <b>Concern about users' Twitter activity being monitored as described above for the purpose of recruitment into a clinical trial</b> |                                                                                | 603 (100%)  | 349 (57.9%)         | 228 (37.8%)              |
| <b>Factors that most impacted level of concern about the above scenario</b> (respondents could select up to 2)                       |                                                                                |             |                     |                          |
|                                                                                                                                      | Nature of the disease/medical condition being monitored for                    | 243 (40.3%) | 165 (47.3%)         | 73 (32.0%)               |

|                                                                                                                                      |                                                                                |             |                     |                          |
|--------------------------------------------------------------------------------------------------------------------------------------|--------------------------------------------------------------------------------|-------------|---------------------|--------------------------|
|                                                                                                                                      | Whether the text of a Twitter message was monitored vs. a hashtag              | 154 (25.5%) | 96 (27.5%)          | 51 (22.4%)               |
|                                                                                                                                      | How far back in your Twitter history the researchers might look                | 133 (22.1%) | 87 (24.9%)          | 38 (16.7%)               |
|                                                                                                                                      | Who is doing the research                                                      | 250 (41.5%) | 131 (37.5)          | 109 (47.8%)              |
|                                                                                                                                      | Whether a human being or a computer program is analyzing your Twitter messages | 127 (21.1%) | 81 (23.2%)          | 45 (19.7%)               |
|                                                                                                                                      | Use of Twitter as a method in which the researchers contacted you              | 190 (31.5%) | 126 (36.1%)         | 56 (24.6%)               |
| <b>Comfort level if a researcher approached them in person at a relevant medical facility</b>                                        |                                                                                |             |                     |                          |
|                                                                                                                                      | More comfortable in-person                                                     | 174 (28.9%) | 122 (35.0%)         | 50 (21.9%)               |
|                                                                                                                                      | Neither more or less comfort                                                   | 213 (35.3%) | 92 (26.4%)          | 115 (50.4%)              |
|                                                                                                                                      | Less comfortable in-person                                                     | 156 (25.9%) | 102 (29.2%)         | 50 (21.9%)               |
|                                                                                                                                      | Don't know                                                                     | 60 (10.0%)  | 33 (9.5%)           | 13 (5.7%)                |
| <b>Smoking vignette</b>                                                                                                              |                                                                                |             |                     |                          |
| <b>CONCERN EXPRESSED IN RESPONSE TO VIGNETTES</b>                                                                                    |                                                                                | <b>All</b>  | <b>Some Concern</b> | <b>Little/No Concern</b> |
| <b>Concern about users' Twitter activity being monitored as described above for the purpose of recruitment into a clinical trial</b> |                                                                                | 603 (100%)  | 255 (42.3%)         | 332 (55.1%)              |
| <b>Factors that most impacted level of concern about the above scenario</b> (respondents could select up to 2)                       |                                                                                |             |                     |                          |
|                                                                                                                                      | Nature of the disease/medical condition being monitored for                    | 163 (27.0%) | 72 (28.3%)          | 90 (27.1%)               |
|                                                                                                                                      | Whether the text of a Twitter message was monitored vs. a hashtag              | 146 (24.2%) | 69 (27.2%)          | 74 (22.3%)               |
|                                                                                                                                      | How far back in your Twitter history the researchers might look                | 143 (24.7%) | 70 (27.6%)          | 69 (20.8%)               |

|                                                                                               |                                                                                |             |             |             |
|-----------------------------------------------------------------------------------------------|--------------------------------------------------------------------------------|-------------|-------------|-------------|
|                                                                                               | Who is doing the research                                                      | 269 (44.6%) | 110 (43.3%) | 155 (46.7%) |
|                                                                                               | Whether a human being or a computer program is analyzing your Twitter messages | 123 (20.4%) | 63 (24.8%)  | 57 (17.2%)  |
|                                                                                               | Use of Twitter as a method in which the researchers contacted you              | 173 (28.7%) | 89 (35.0%)  | 78 (23.5%)  |
| <b>Comfort level if a researcher approached them in person at a relevant medical facility</b> |                                                                                |             |             |             |
|                                                                                               | More comfortable in-person                                                     | 161 (26.7%) | 94 (37.0%)  | 64 (19.3%)  |
|                                                                                               | Neither more or less comfort                                                   | 267 (44.3%) | 93 (36.6%)  | 172 (51.8%) |
|                                                                                               | Less comfortable in-person                                                     | 122 (20.3%) | 47 (18.5%)  | 72 (21.7%)  |
|                                                                                               | Don't know                                                                     | 52 (8.4%)   | 20 (7.9%)   | 24 (7.2%)   |
